# Supplementary material for: Conserved epigenetic regulatory logic infers genes governing cell identity
Source: bioRxiv or medRxiv preprint supplement (doi:10.1101/635516), 2020-10-09
Supplement: Supplementary file [file media-1.pdf]

# Conserved epigenetic regulatory logic infers genes governing cell identity

## Supplementary Information

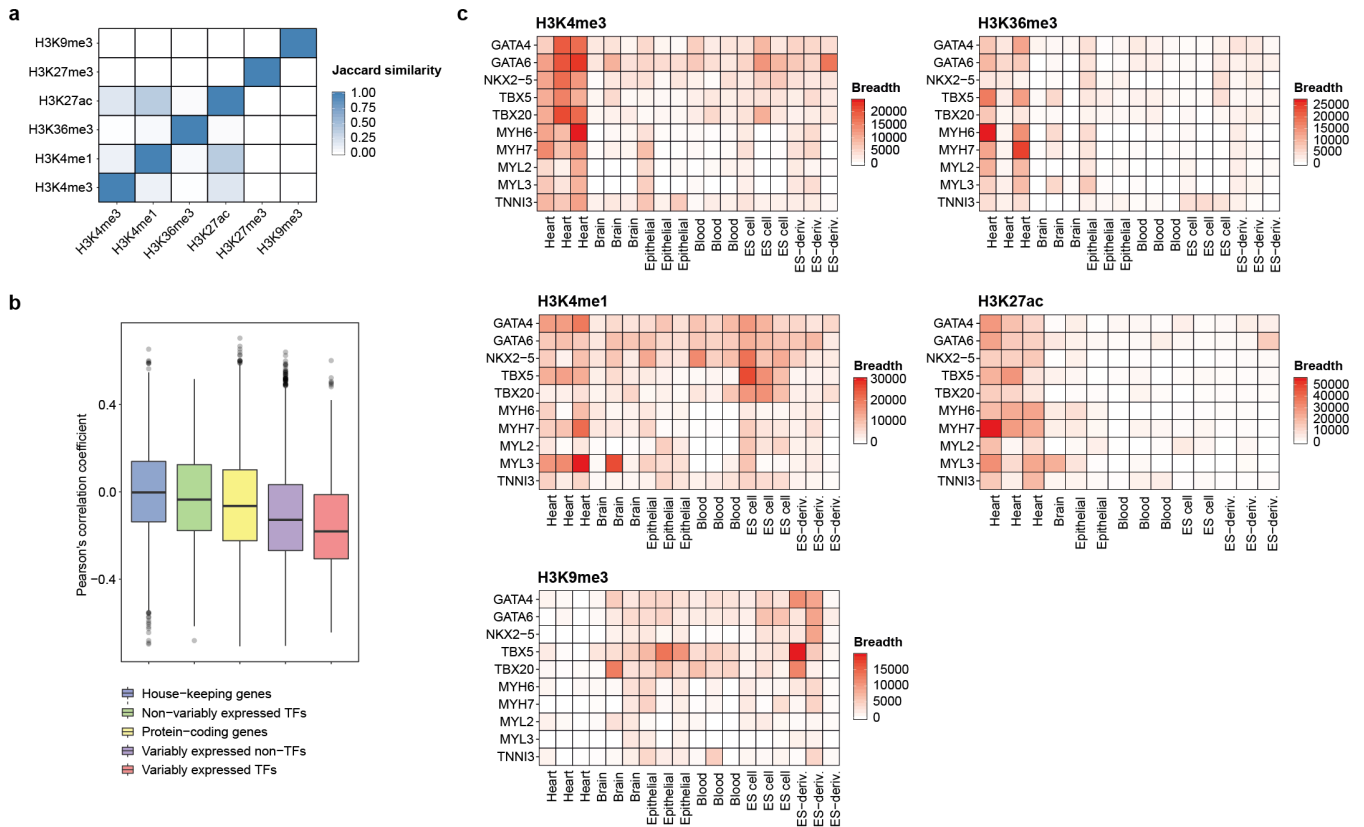

**Supplementary Figure 1:** H3K27me3 histone modification (HM) domains have distinct functional association with cell type specific regulatory genes (Supplementary to Figure 1).

**(a)** Distinct gene sets are identified by different types of broad HM domains. Similarity between top 200 genes that are most frequently associated with broad HM domains observed across 111 Roadmap tissue and cell types.

**(b)** Correlation between the H3K27me3 domain breadth and the corresponding expression value of genes observed across 46 Roadmap tissue and cell types. Stronger negative correlation is observed for variably expressed TFs ( $n=634$ , median Pearson's  $r = -0.181$ ), compared to variably expressed non-TFs ( $n=7,406$ , median Pearson's  $r = -0.128$ ,  $p=2.57e-07$ ), all protein-coding genes ( $n=18,490$ , median Pearson's  $r = -0.064$ ,  $p=2.55e-25$ ), non-variably expressed TFs ( $n=793$ , median Pearson's  $r = -0.035$ ,  $p=2.31e-23$ ) and housekeeping genes ( $n=3,818$ , median Pearson's  $r = -0.002$ ,  $p=7.7e-54$ ) (Welch's t-test, one-tailed).

**(c)** Breadths of HM domains associated with selected cardiac-specific regulatory (*GATA4*, *GATA6*, *NKX2-5*, *TBX5*, *TBX20*) and structural (*MYH6*, *MYH7*, *MYL2*, *MYL3*, *TNNI3*) genes in 18 Roadmap sample; Heart (E095, E104, E105), Brain (E070, E071, E082), Epithelial (E057, E058, E059), Blood (E037, E038, E047), ES cell (E003, E016, E024) and ES-deriv. (E004, E005, E006).

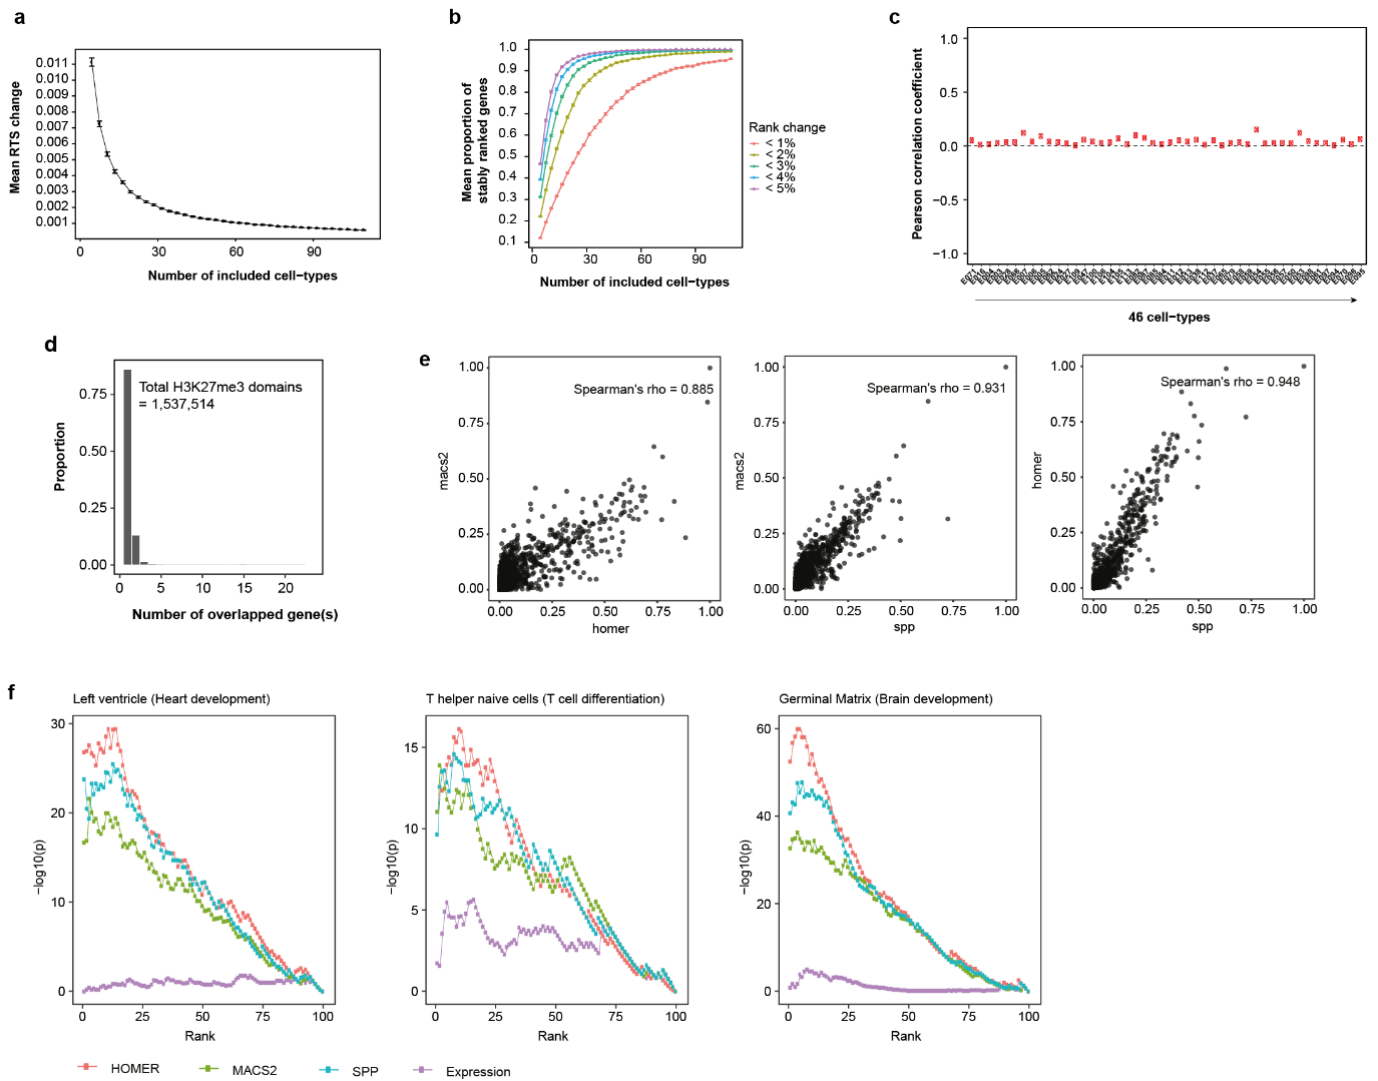

**Supplementary Figure 2:** Repressive tendency scores (RTS) estimated using the 111 Roadmap epigenomic datasets are stable and reproducible (Supplementary to Figures 2 and 3).

**(a)** Mean RTS changes ( $y$ -axis) with a cumulative addition of samples ( $x$ -axis). 111 Roadmap samples are randomly sorted and RTS values are calculated iteratively with an addition of 3 samples (without replacement) until all samples are included. This process is repeated 1,000 times. Error bars show 95% the confidence interval. Source data are provided as a Source Data file.

**(b)** Mean proportion of stably ranked genes ( $y$ -axis) with a cumulative addition of samples ( $x$ -axis) (see Methods). 111 Roadmap samples are randomly sorted and RTS values are calculated iteratively with an addition of 3 samples without replacement until all samples are included. This process is repeated 1,000 times. Error bars show 95% the confidence interval. Source data are provided as a Source Data file.

**(c)** Correlation between the expression value and the discordance score for protein coding genes ( $n=18,707$ ) across the 46 Roadmap cell types.

**(d)** The number of genes overlapped by H3K27me3 domains assigned to protein coding genes ( $n=1,537,514$ ). Approximately 85% of these domains overlap a single gene.

**(e)** Correlation between RTSs calculated from H3K27me3 domains identified by 3 different peak callers (i.e. MACS2, SPP2 and HOMER).

**(f)** Enrichment of cell type-specific regulatory genes (i.e. TFs with ‘Heart development’ GO:0007507, ‘T cell differentiation’ GO:0030217 and ‘Brain development’ GO:0007420 for left ventricle (E095), T helper naïve cell (E038) and brain germinal matrix (E070) samples respectively, from left to right). Genes are sorted by the DS (See Predicting cell-type-specific regulatory genes based on H3K27me3) calculated with 3 different versions of RTSs and binned into a percentile bin.

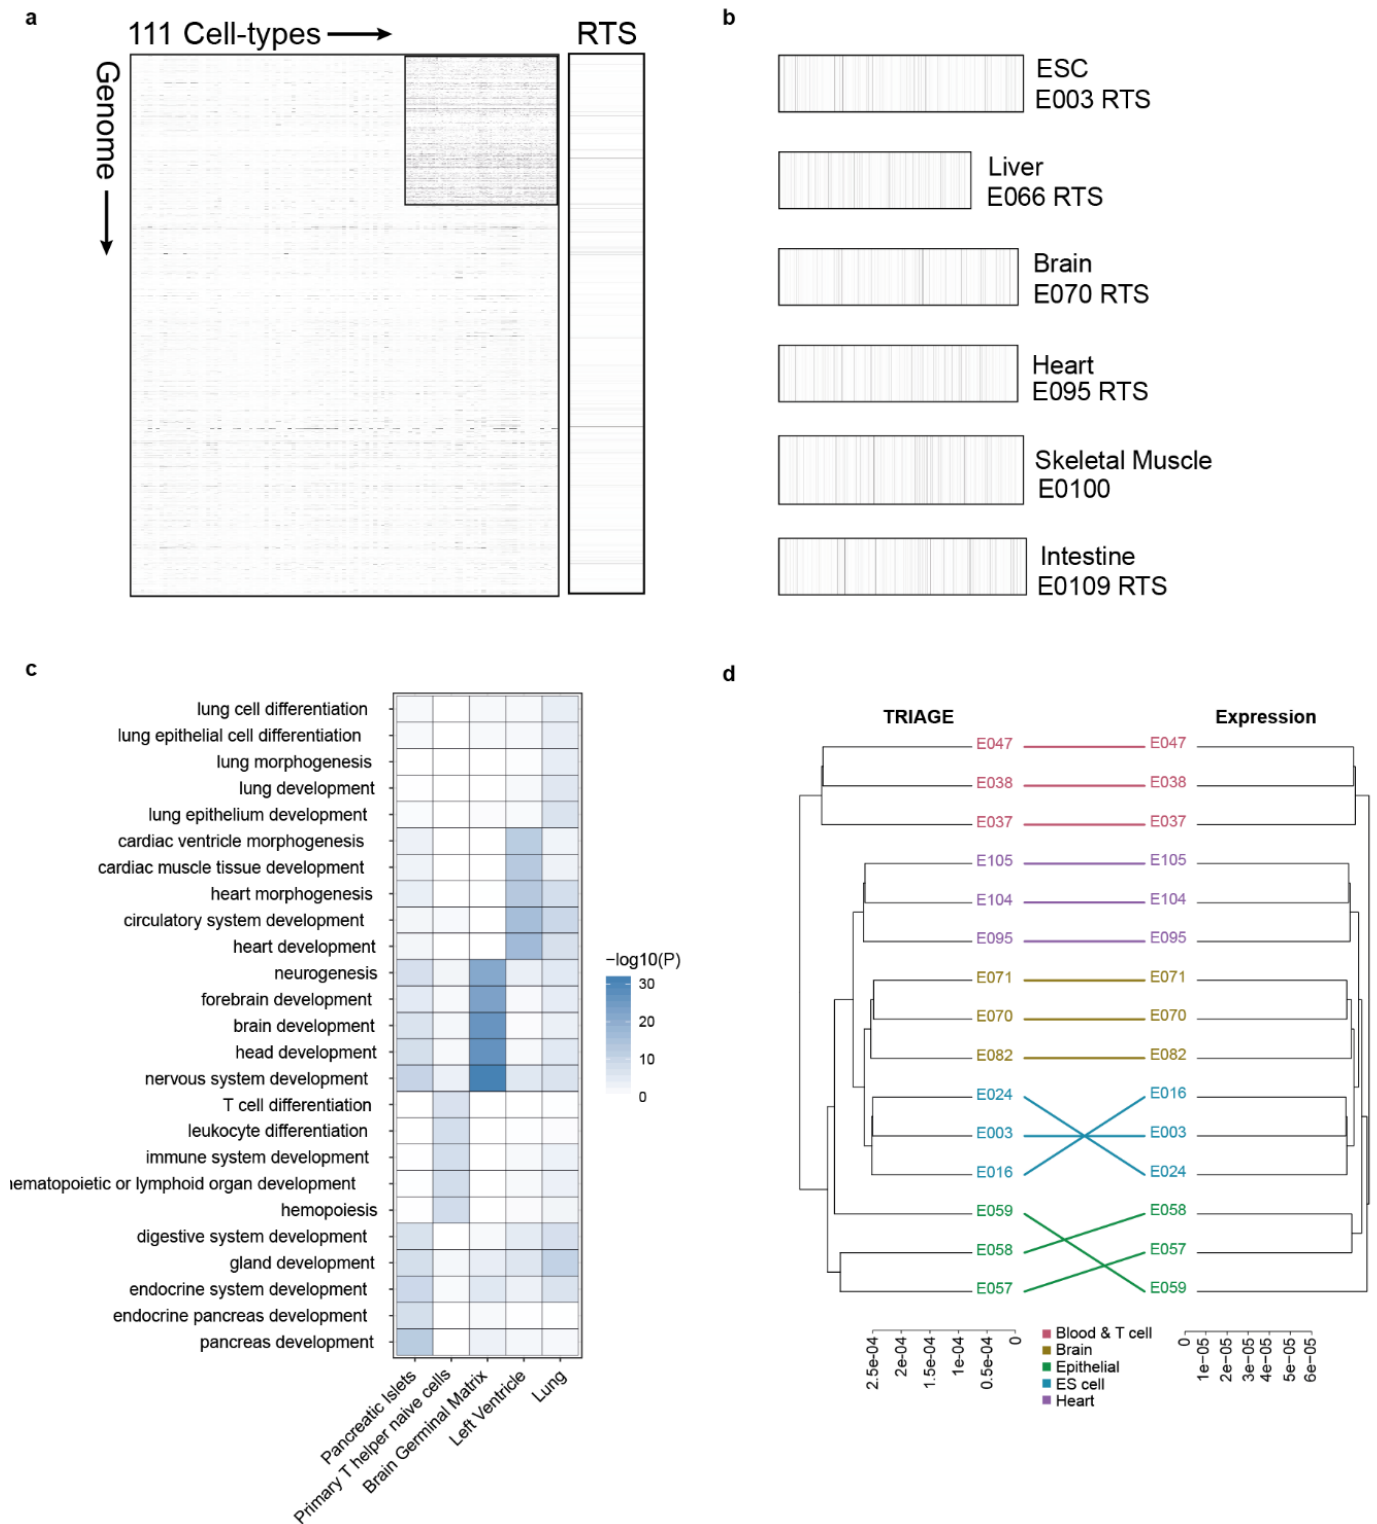

**Supplementary Figure 3:** TRIAGE is an application of gene-specific RTS to the input expression readout (Supplementary to Figures 2 and 3).

**(a) (Left)** Breadth of H3K27me3 domains assigned to 26,833 RefSeq genes (row) across the 111 Roadmap tissue and cell types (column). Darkness of the band shows the breadth of the assigned domain. **(Inset)** Top 5% broadest domains associated with the genes (row) across the Roadmap samples (column). **(Right)** RTS values corresponding the genes (row). Darkness of the band shows the RTS.

**(b)** TRIAGE collects a different set of RTS values specific for input transcriptome. Each collection represents a distinct Roadmap cell or tissue type. For each collection, all genes with an expression value (RPKM>0) are sorted from left (high) to right (low). Darkness of the band shows the RTS value.

**(c)** Enrichment of tissue or cell type-specific GO biological process terms among top 1% genes selected by using the DS in 5 distinct Roadmap tissue or cell types (Fisher's exact test, one-tailed); Pancreatic Islets (E087), Primary T helper naïve cells from peripheral blood (E038), Brain Germinal Matrix (E070), Left Ventricle (E095), Lung (E096).

**(d)** Similarity between 15 Roadmap samples based on (i) the original transcript abundance (Expression) and (ii) the DS (TRIAGE). Distance between samples is shown as 1-Pearson's correlation coefficient. For description of samples, see Supplementary table1.

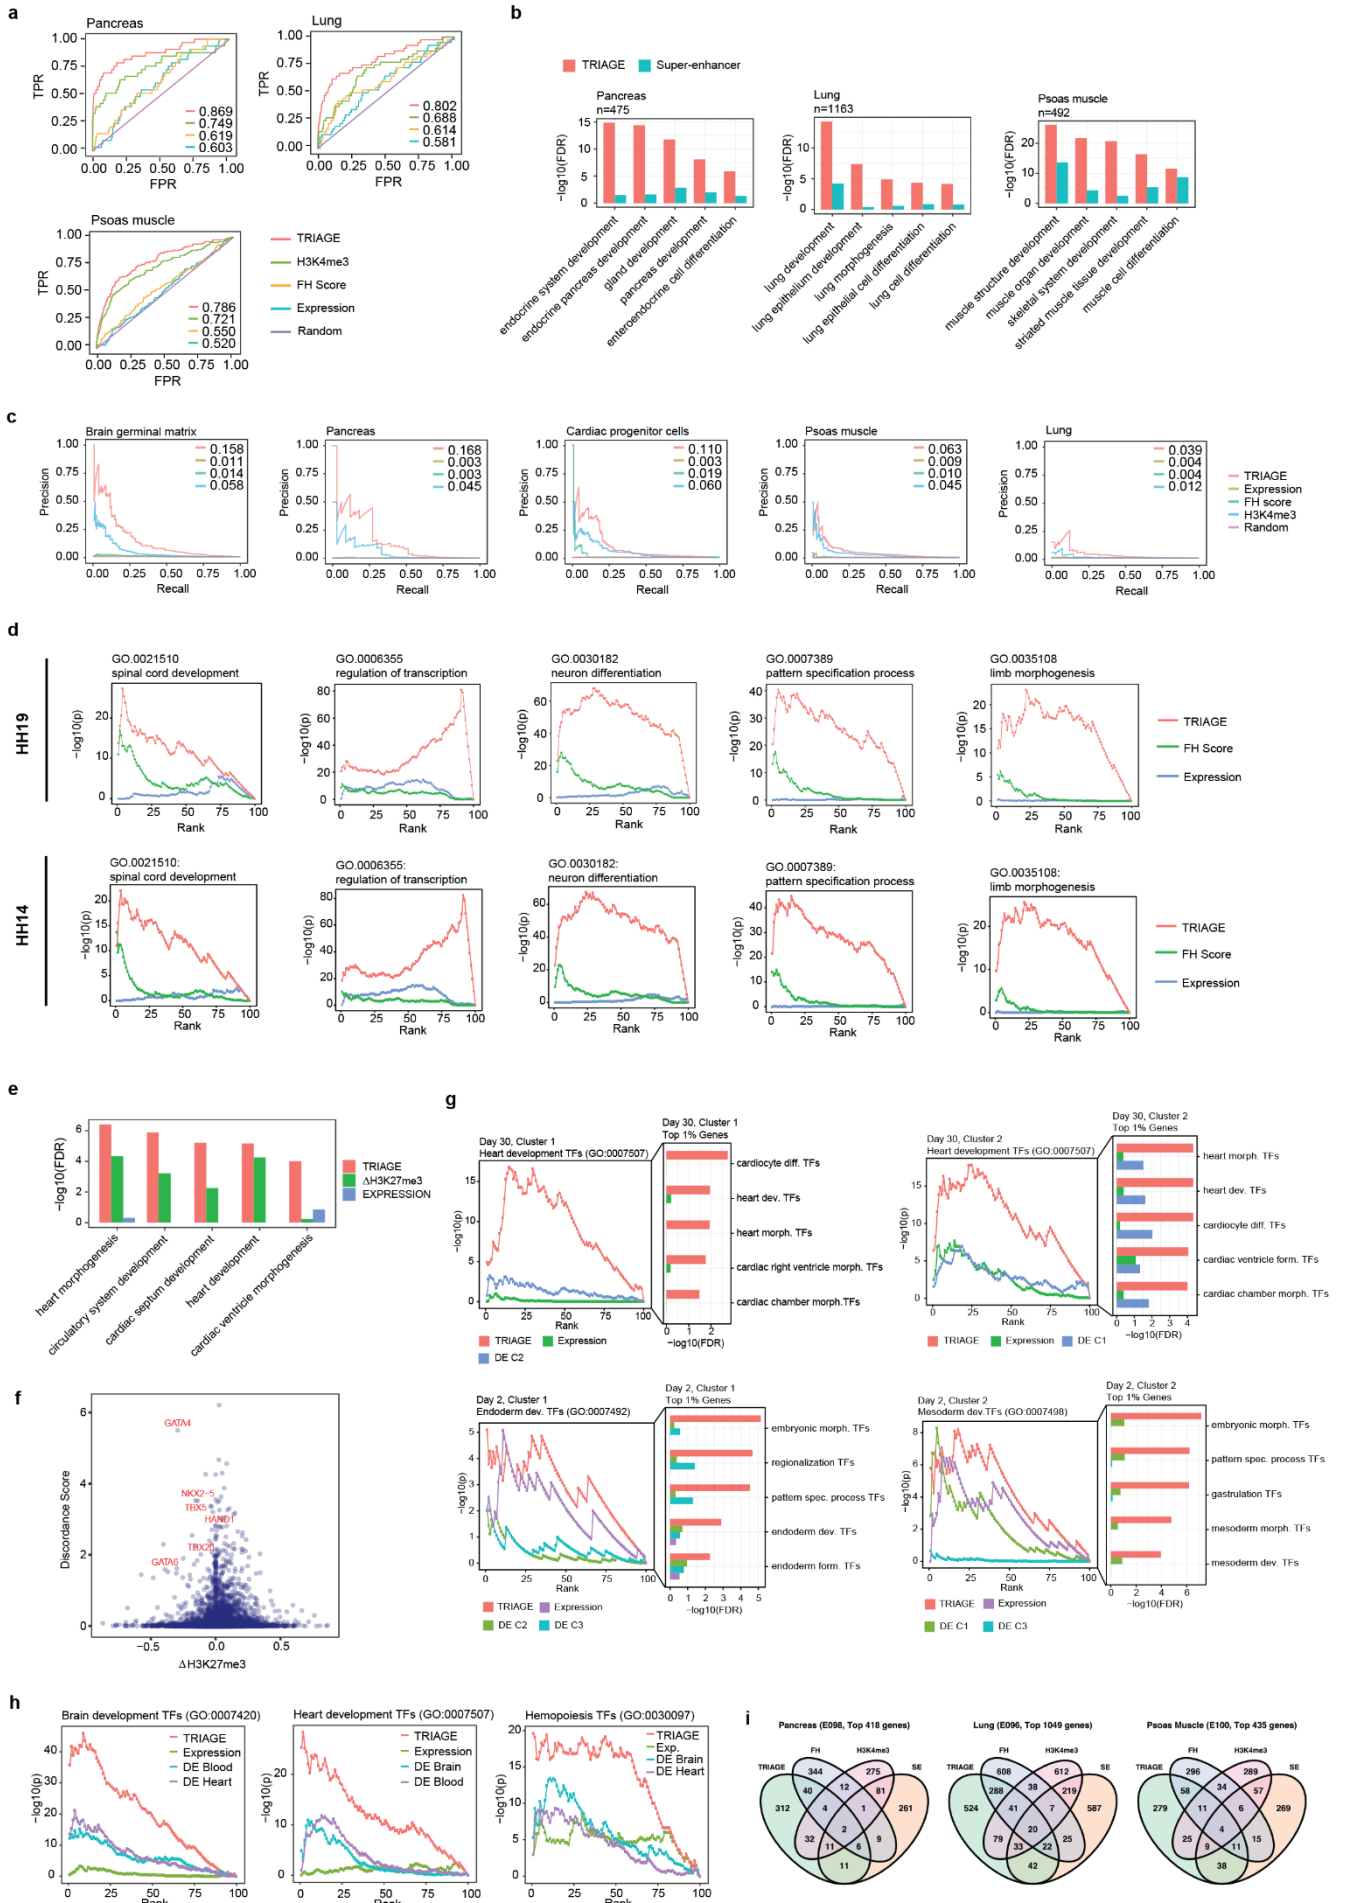

**Supplementary Figure 4:** TRIAGE effectively prioritizes key regulators of cell identity across diverse cell states (Supplementary to Figures 3 and 4).

**(a)** Receiver operating characteristic (ROC) comparing performance of TRIAGE against other methods for pancreas (E087), lung (E096) and psoas muscle (E100). Area under curve (AUC) values are shown on the bottom right corner.

**(b)** Functional enrichment of top  $n$  genes identified by TRIAGE or super-enhancer (SE), where  $n$  is defined by the number of active genes nearest to SEs (Fisher's exact test, one-tailed, see Methods). For the full list, see Supplementary table 7.

**(c)** Precision-recall curves (PRC) for the 5 different tissue groups. Area under curve (AUC) values are shown on the top right corner.

**(d)** Enrichment of embryonic development GO terms for developing chicken embryo data<sup>1</sup> (Fisher's exact test, one-tailed). Genes are sorted by a given metric (i.e. DS, functional heterogeneity (FH) score or expression value) and binned into a percentile bin ( $x$ -axis). For the full list, see Supplementary table 8.

**(e)** Functional enrichment of top 100 genes ranked by TRIAGE, H3K27me3 loss ( $\Delta$ H3K27me3) or expression value, for definitive cardiomyocyte (day 14) data<sup>2</sup>. For the full GO term list, see Supplementary table 9.

**(f)** Discordance score ( $y$ -axis) and H3K27me3 loss ( $\Delta$ H3K27me3,  $x$ -axis) for selected cardiac specific regulatory genes (*GATA4*, *GATA6*, *HAND1*, *TBX5*, *NKX2-5* and *TBX20*) for definitive cardiomyocyte (day 14) data.

**(g)** Enrichment of developmental GO terms among only expressed TFs for hiPSC data<sup>3</sup> (Fisher's exact test, one-tailed). TFs are sorted by a given metric (i.e. DS, differential expression (DE) fold-change or expression value) and binned into a percentile bin ( $x$ -axis). Also, top 1% TFs are extracted for detailed functional enrichment analysis. For the full list, see Supplementary table 10.

**(h)** Enrichment of TFs with a developmental GO term specific for 3 distinct Roadmap tissue types (Fisher's exact test, one-tailed). Genes are sorted by a given metric (i.e. DS, differential expression (DE) fold-change or expression value) and binned into a percentile bin ( $x$ -axis).

**(i)** Overlap of top ranked genes identified by different approaches. The number of genes compared is determined by the number of nearest active genes to SEs.

**a**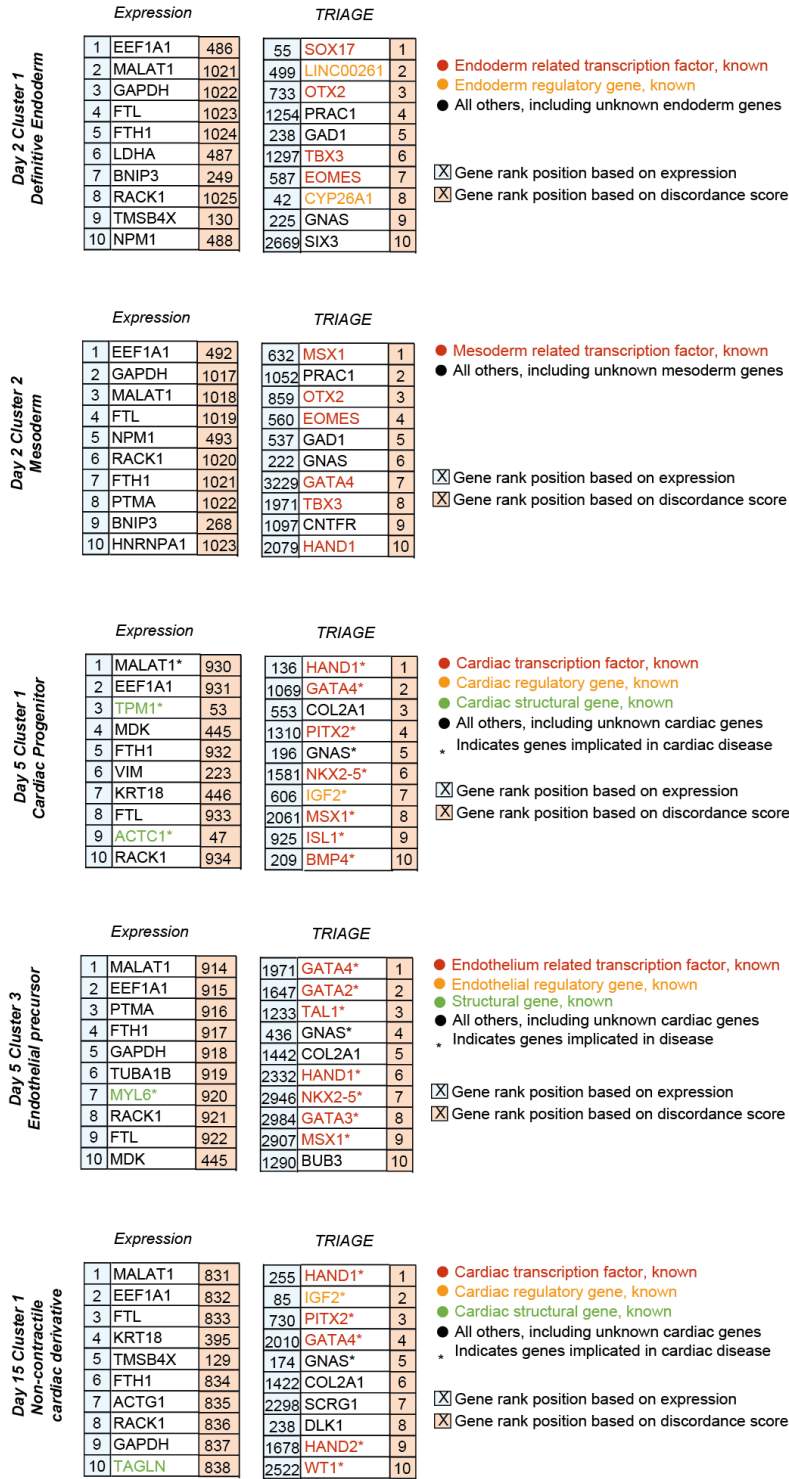**b**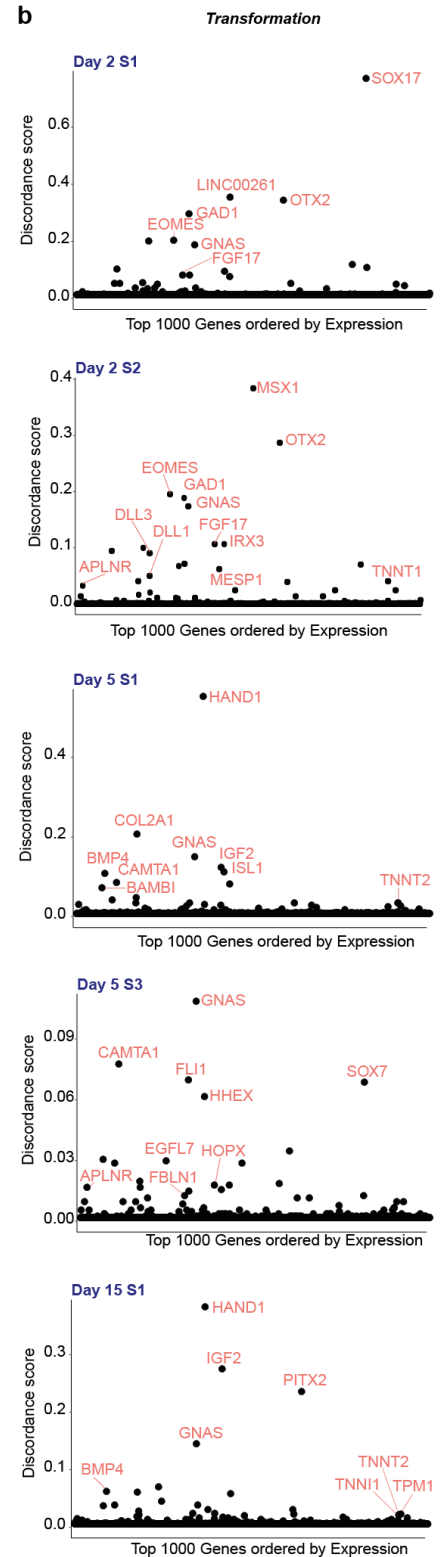

**Supplementary Figure 5:** TRIAGE identifies known cell-type specific regulatory genes across diverse cell populations found during *in vitro* cardiac-directed differentiation (Supplementary to Figure 4).

(a) Top 10 genes ranked by the expression value or the discordance score from diverse cell populations from scRNA-seq of *in vitro* cardiac directed differentiation during germ layer specification (Day 2), cardiac progenitor specification (Day 5) and cardiomyocyte specification (Day 30).

(b) Transformation of the transcriptomic expression profile to the discordance score prioritizes known cell type specific TFs and regulatory genes across diverse cell populations.

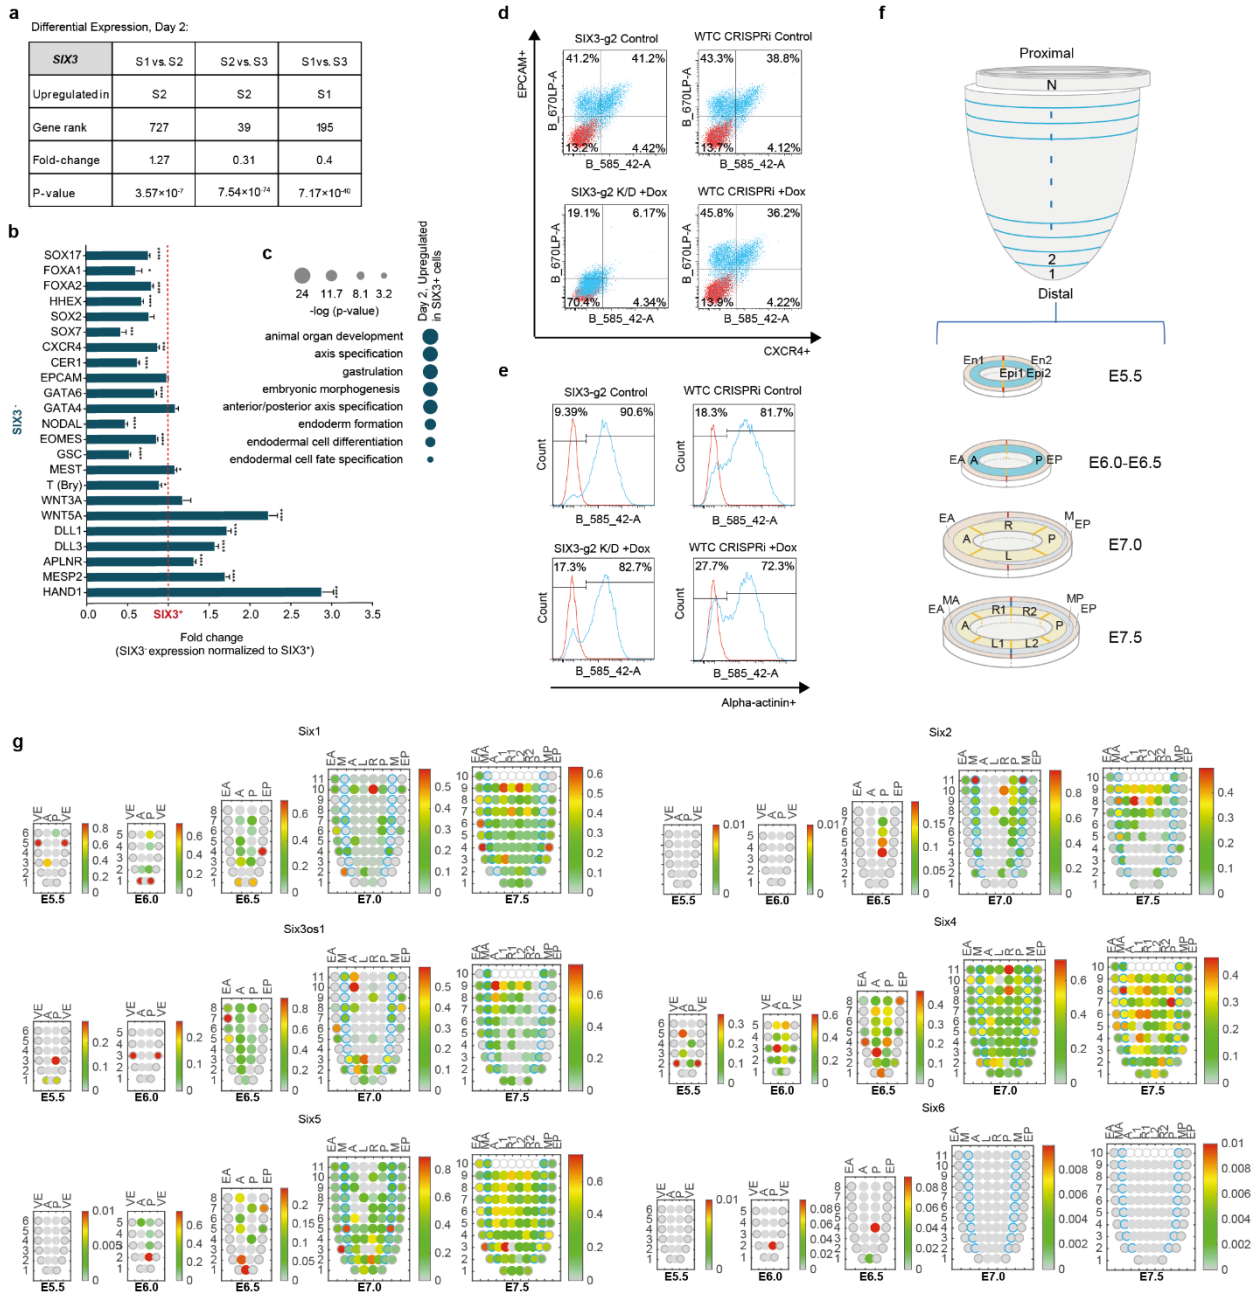

**Supplementary Figure 6:** Additional information on *SIX3*, a gene identified by TRIAGE to have a novel role in germ-layer specification during *in vitro* cardiac-directed differentiation (Supplementary to Figure 6).

(a) *SIX3* gene rank using differential expression analysis comparing clusters on Day 2 of scRNA-seq of *in vitro* cardiac directed differentiation shows that *SIX3* was not prioritized in this expression-based analysis.

(b) Analysis of gene expression comparing *SIX3*<sup>+</sup> vs *SIX3*<sup>-</sup> cells on Day 2 of scRNA-seq dataset assessing a panel of germ layer specification genes including markers of endodermal lineages (*SOX17*, *FOXA2*, *FOXA1*, *HHEX*, *SOX2*, *SOX7*, *CXCR4*, *CER1*, *GATA6*), mesendoderm (*EPCAM*, *NODAL*, *EOMES*, *GSC*) and mesodermal lineages (*GATA4*, *T-Bry*, *WNT3A*, *WNT5A*, *DLL1*, *DLL3*, *APLNR*, *MESP2*, *HAND1*).

(c) Gene ontology (GO) analysis on day 2 of differentially expressed genes between *SIX3*<sup>+/−</sup> populations displaying GO terms upregulated in *SIX3*<sup>+</sup> cells.

(d) Raw FACS plots of EPCAM/CXCR4 analysis for all conditions tested ( $n=12-16$  technical replicates per condition from 4-5 experiments).

(e) Raw FACS plots of alpha-actinin analysis for all conditions tested ( $n=6$  technical replicates per condition from 3 experiments).

(f) Sample collection from E5.5-E7.5 embryos for analysis of spatiotemporal transcription. Positions of the cell populations in the embryo: the proximal-distal location in descending numerical order (1 = most distal site, N value of the most proximal section varied by the proximal-distal size of the embryo) and in the transverse plane of the germ layers: endoderm, anterior half (EA) and posterior half (EP); mesoderm, anterior half (MA) and posterior half (MP);



epiblast/ectoderm, anterior (A), posterior (P) containing the primitive streak, right (R)-anterior (R1) and posterior (R2), left (L)-anterior (L1) and posterior (L2).

**(g)** Corn plots showing spatial domains of *SIX* family genes expression in the germ layers of E5.5, E6.0, E6.5, E7.0 and E7.5 mouse embryos. The “kernels” in the plot represent the cell populations at different positions in the tissue layers of the embryo (panel **f**). Gradient scale shows the level of gene expression (by RNA-seq transcript reads) in each kernel.

**a** FACs analysis on Day 2 samples stained for EPCAM/CXCR4:

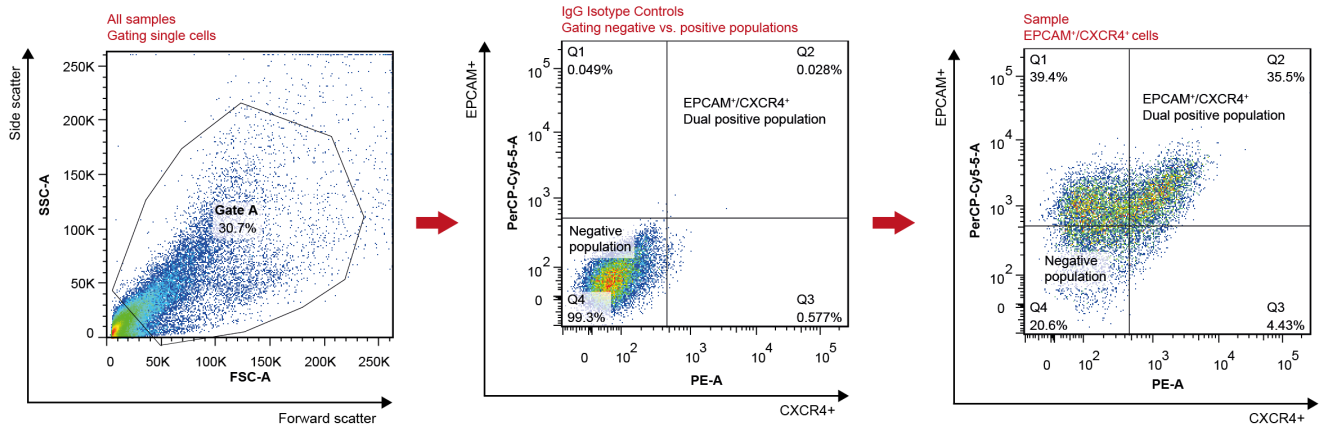

**b** FACs analysis on Day 15 samples stained for alpha-actinin:

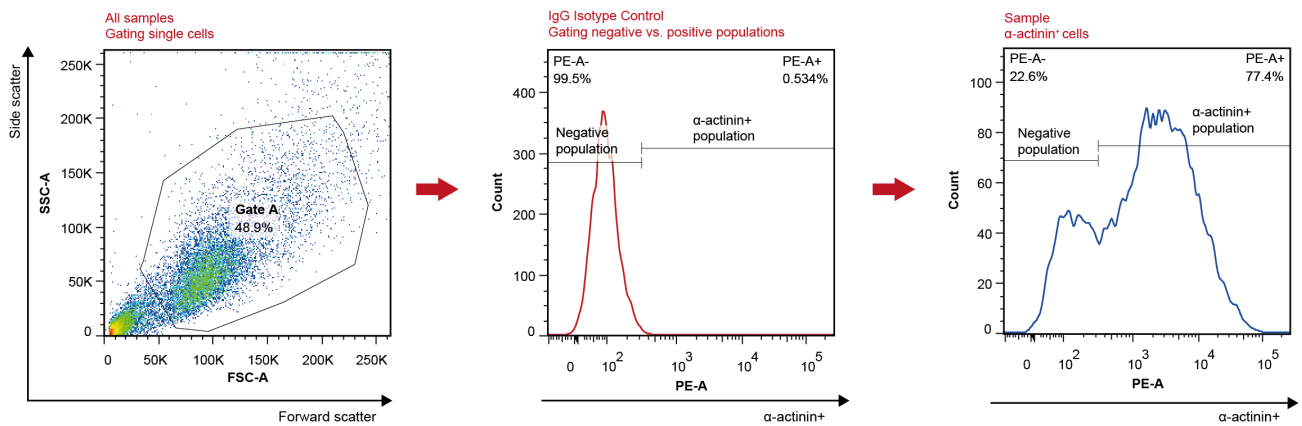

**Supplementary Figure 7.** Flow cytometry gating strategy for analyses performed using SIX3-K/D iPSCs (Supplementary to Figure 6)

**(a)** For Day 2 samples dual-stained for EPCAM/CXCR4: first, all samples were gated to select singlets, excluding debris and doublets (Gate A= SSC-A vs. FSC-A). Singlets from fluorophore-specific IgG isotype controls (negative control) were used to distinguish between negative and positive populations in two parameter density plots (PerCP-Cy5.5-A vs. PE-A).

**(b)** For Day 15 samples stained for alpha-actinin: first, all samples were gated to select singlets (Gate A= SSC-A vs. FSC-A). Singlets from fluorophore-specific IgG isotype controls were used to distinguish between negative and positive populations in single parameter histograms (Count vs. PE-A).

## Supplementary Tables

**Supplementary Table 1.** Descriptions of data sets used to estimate repressive tendency scores (RTS) and test performance of TRIAGE. These includes all 111 consolidated epigenomes from the NIH Roadmap project and a subset of 46 tissue or cell types with RNA-seq data, 329 CAGE-seq samples from the FANTOM5 project, 30 proteomes for distinct tissues and datasets from different species.

**Supplementary Table 2.** Lists of 634 variably expressed TFs (VETs) and tissue type specific regulatory genes used as the positive gene set for the performance analysis. We defined positive gene sets for the 5 distinct tissue types (i.e. heart, brain, lung, pancreas and skeletal muscle) by identifying TFs associated with a GO biological process term specific to a given tissue type.

**Supplementary Table 3.** Details of broad H3K27me3 domains from the 111 Roadmap cell types and the repressive tendency score (RTS) table.

**Supplementary Table 4.** Enrichment of KEGG pathway terms and selected GO biological process terms. Genes were ranked by the RTS and enrichment of a specific KEGG pathway or GO BP term was analyzed using Fisher's exact test (one-sided) across rank positions. Values are *p*-values or proportions.

**Supplementary Table 5.** Expression and discordance score (DS) across 12 different tissue types from Tabula Muris data sets. TRIAGE was applied to the expression data from two different single-cell RNA-seq platforms (i.e. 10x and SmartSeq2). Expression values of genes were averaged from all samples belonging to the tissue type.

**Supplementary Table 6.** Genes frequently ranked within top 50 by the expression value or the DS for proliferative and invasive melanoma states. Genes were sorted by the association frequency.

**Supplementary Table 7.** Functional enrichment for top ranked *n* genes (where *n* is the number of active genes nearest to super-enhancers, see Methods), comparing between TRIAGE and SE-based approach across 5 different Roadmap tissue types. Values shown are false discovery rate by Benjamini-Hochberg.

**Supplementary Table 8.** Enrichment of 19 GO terms relevant to embryonic neural differentiation extracted from Rehimi et al.<sup>1</sup>, comparing between TRIAGE and functional heterogeneity (FH) score. Values shown are *p*-value at a given rank percentile bin (Fisher's exact test, one-tailed).

**Supplementary Table 9.** Functional enrichment of top 100 genes ranked by TRIAGE, H3K27me3 loss or expression value for definitive cardiomyocyte data (day 14)<sup>2</sup> (Fisher's exact test, one-sided).

**Supplementary Table 10.** Functional enrichment for top 1% TFs ranked by TRIAGE (Discordance), fold-change from DEG analysis and raw expression value.

## References

1. Rehimi, R. *et al.* Epigenomics-Based Identification of Major Cell Identity Regulators within Heterogeneous Cell Populations. *Cell Rep* **17**, 3062-3076 (2016).
2. Paige, S.L. *et al.* A temporal chromatin signature in human embryonic stem cells identifies regulators of cardiac development. *Cell* **151**, 221-32 (2012).
3. Friedman, C.E. *et al.* Single-cell transcriptomic analysis of cardiac differentiation from human PSCs reveals HOPX-dependent cardiomyocyte maturation. *Cell stem cell* **23**, 586-598. e8 (2018).
